# Supplementary material for: Collective effects of common SNPs in foraging decisions in Caenorhabditis elegans and an integrative method of identification of candidate genes
Source: PubMed Central journal article supplement (PMC4652280; doi:10.1038/srep16904), 2015-11-19
Supplement: srep16904-s1.pdf [file srep16904-s1.pdf]

SUPPLEMENTARY INFORMATION

**Collective effects of common SNPs in foraging decisions in *Caenorhabditis elegans* and an integrative method of identification of candidate genes**

Zuobin Zhu, Qing Lu, Junjing Wang, and Shi Huang\*

State Key Laboratory of Medical Genetics, School of Life Sciences, Xiangya Medical School, Central South University. 110 Xiangya Road, Changsha, Hunan 410078, China

\*Corresponding author: [huangshi@sklmg.edu.cn](mailto:huangshi@sklmg.edu.cn)

**Supplementary Fig 1: RNAi knockdown in HW or N2 strain of genes linked with leaving**

events but not MAC. Data are mean  $\pm$  S.E.M. ns: non-significant, \*  $P < 0.05$ , Student's t-test.

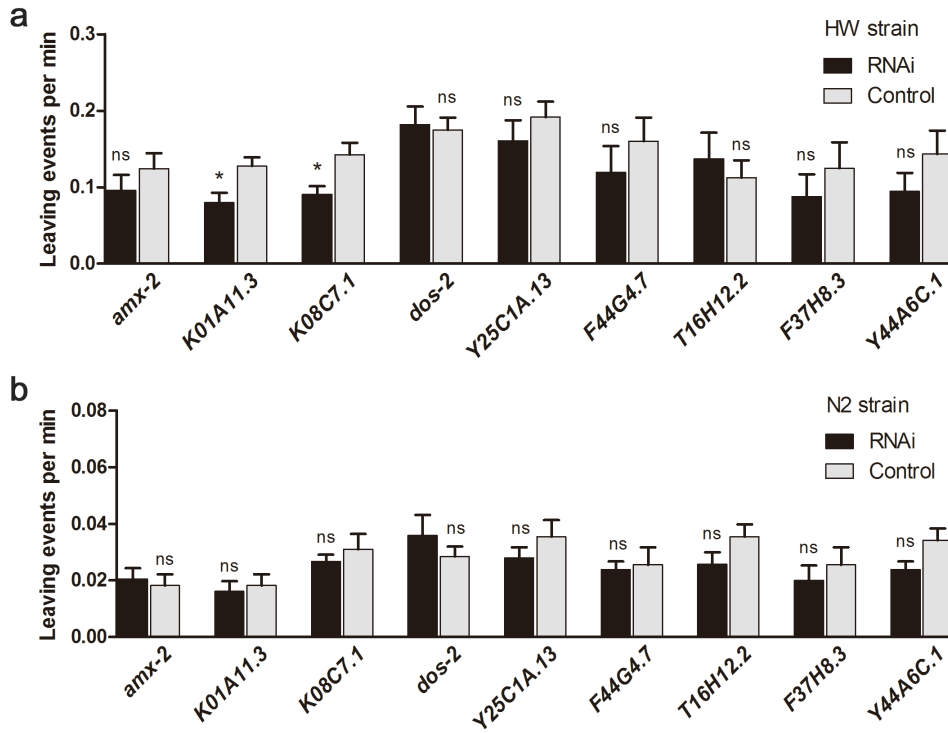

**Supplementary Fig 2: RNAi knockdown in the N2 and HW strain of genes linked with neither**

leaving events nor MAC. Data are mean  $\pm$  S.E.M. ns: non-significant.

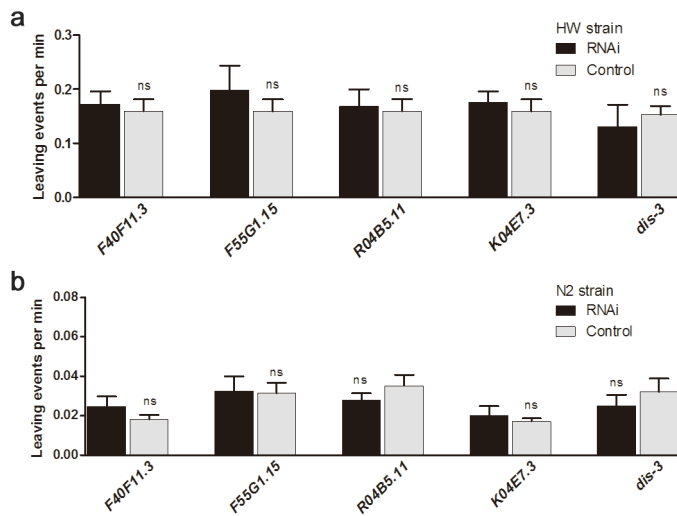

**Supplementary Table S1:** Basic description of the 83 RIALs used in the study.

| Strain | npr-1<br>genotype | tyra-3<br>genotype | HAC    | MAC    | MAC2   | Leaving R | SEM    |
|--------|-------------------|--------------------|--------|--------|--------|-----------|--------|
| QX10   | HW                | HW                 | 0.4451 | 0.4493 | 0.2274 | 0.0589    | 0.0295 |
| QX107  | HW                | HW                 | 0.4818 | 0.4859 | 0.5360 | 0.0949    | 0.0164 |
| QX11   | HW                | HW                 | 0.5072 | 0.4577 | 0.2900 | 0.0420    | 0.0164 |
| QX12   | HW                | HW                 | 0.4296 | 0.2701 | 0.2566 | 0.0289    | 0.0099 |
| QX124  | HW                | HW                 | 0.6076 | 0.4192 | 0.3937 | 0.0398    | 0.0053 |
| QX125  | HW                | HW                 | 0.4859 | 0.4460 | 0.3585 | 0.1677    | 0.0355 |
| QX127  | HW                | HW                 | 0.6747 | 0.6733 | 0.5624 | 0.0258    | 0.0154 |
| QX13   | HW                | HW                 | 0.5608 | 0.3918 | 0.4482 | 0.0247    | 0.0119 |
| QX131  | HW                | HW                 | 0.4811 | 0.2955 | 0.3199 | 0.0373    | 0.0109 |
| QX132  | HW                | HW                 | 0.4529 | 0.2729 | 0.3040 | 0.0275    | 0.0043 |
| QX133  | HW                | HW                 | 0.7698 | 0.6007 | 0.6028 | 0.0454    | 0.0216 |
| QX14   | HW                | HW                 | 0.4591 | 0.4481 | 0.5132 | 0.1022    | 0.0372 |
| QX144  | HW                | HW                 | 0.4477 | 0.4395 | 0.4429 | 0.0494    | 0.0199 |
| QX149  | HW                | HW                 | 0.3230 | 0.3024 | 0.1511 | 0.0256    | 0.0066 |
| QX151  | HW                | HW                 | 0.3508 | 0.2297 | 0.2201 | 0.0589    | 0.0133 |
| QX154  | HW                | HW                 | 0.2955 | 0.2983 | 0.3234 | 0.0832    | 0.0206 |
| QX158  | HW                | HW                 | 0.3863 | 0.3409 | 0.4025 | 0.0466    | 0.0061 |
| QX167  | HW                | HW                 | 0.5952 | 0.6460 | 0.6432 | 0.2609    | 0.0834 |
| QX168  | HW                | HW                 | 0.4364 | 0.5175 | 0.5764 | 0.0705    | 0.0068 |
| QX169  | HW                | HW                 | 0.6069 | 0.5065 | 0.5378 | 0.1216    | 0.0434 |
| QX179  | HW                | HW                 | 0.6864 | 0.5880 | 0.5905 | 0.1737    | 0.0760 |
| QX182  | HW                | HW                 | 0.4832 | 0.4502 | 0.4464 | 0.0063    | 0.0063 |
| QX195  | HW                | HW                 | 0.2467 | 0.3649 | 0.2548 | 0.0704    | 0.0221 |
| QX196  | HW                | HW                 | 0.5038 | 0.4667 | 0.3585 | 0.1639    | 0.0380 |
| QX198  | HW                | HW                 | 0.4979 | 0.3487 | 0.2812 | 0.0205    | 0.0048 |
| QX199  | HW                | HW                 | 0.4062 | 0.3938 | 0.3480 | 0.0228    | 0.0166 |
| QX200  | HW                | HW                 | 0.5581 | 0.4467 | 0.4798 | 0.1475    | 0.0314 |
| QX202  | HW                | HW                 | 0.4131 | 0.2577 | 0.1670 | 0.0220    | 0.0090 |
| QX205  | HW                | HW                 | 0.4023 | 0.3721 | 0.2777 | 0.0454    | 0.0077 |
| QX208  | HW                | HW                 | 0.6131 | 0.6213 | 0.6397 | 0.0228    | 0.0084 |
| QX213  | HW                | HW                 | 0.3924 | 0.4158 | 0.4112 | 0.0959    | 0.0173 |
| QX223  | HW                | HW                 | 0.3801 | 0.3430 | 0.1863 | 0.0318    | 0.0100 |
| QX233  | HW                | HW                 | 0.5938 | 0.4797 | 0.4728 | 0.0603    | 0.0085 |
| QX24   | HW                | HW                 | 0.5409 | 0.3897 | 0.3216 | 0.0738    | 0.0215 |
| QX31   | HW                | HW                 | 0.3122 | 0.4457 | 0.2007 | 0.1357    | 0.0379 |
| QX34   | HW                | HW                 | 0.4021 | 0.4213 | 0.2777 | 0.1181    | 0.0317 |
| QX37   | HW                | HW                 | 0.4811 | 0.4687 | 0.3603 | 0.3209    | 0.1110 |
| QX39   | HW                | HW                 | 0.4914 | 0.3759 | 0.3058 | 0.1400    | 0.0608 |
| QX42   | HW                | HW                 | 0.5436 | 0.4241 | 0.5185 | 0.0593    | 0.0004 |
| QX45   | HW                | HW                 | 0.4227 | 0.2866 | 0.2373 | 0.0415    | 0.0190 |

|       |    |    |        |        |        |        |        |
|-------|----|----|--------|--------|--------|--------|--------|
| QX58  | HW | HW | 0.7010 | 0.5498 | 0.6714 | 0.0409 | 0.0096 |
| QX61  | HW | HW | 0.3678 | 0.3168 | 0.3662 | 0.0331 | 0.0167 |
| QX64  | HW | HW | 0.3678 | 0.3939 | 0.4014 | 0.0238 | 0.0084 |
| QX65  | HW | HW | 0.5601 | 0.6770 | 0.5185 | 0.0786 | 0.0184 |
| QX86  | HW | HW | 0.4085 | 0.4292 | 0.5211 | 0.0114 | 0.0043 |
| QX91  | HW | HW | 0.3753 | 0.2021 | 0.1283 | 0.0112 | 0.0078 |
| QX98  | HW | HW | 0.3196 | 0.4199 | 0.4130 | 0.1217 | 0.0514 |
| QX108 | HW | N2 | 0.4893 | 0.3478 | 0.4042 | 0.0303 | 0.0055 |
| QX121 | N2 | N2 | 0.1979 | 0.2502 | 0.1722 | 0.0112 | 0.0032 |
| QX128 | N2 | N2 | 0.3003 | 0.2893 | 0.1265 | 0.0071 | 0.0031 |
| QX129 | N2 | N2 | 0.3168 | 0.3649 | 0.2004 | 0.0000 | 0.0000 |
| QX134 | N2 | N2 | 0.1622 | 0.2680 | 0.1634 | 0.0000 | 0.0000 |
| QX157 | N2 | N2 | 0.2722 | 0.2021 | 0.1547 | 0.0117 | 0.0062 |
| QX165 | N2 | N2 | 0.3251 | 0.4598 | 0.4587 | 0.0057 | 0.0057 |
| QX171 | N2 | N2 | 0.4811 | 0.4536 | 0.4288 | 0.0037 | 0.0037 |
| QX174 | N2 | N2 | 0.3780 | 0.3643 | 0.1793 | 0.0175 | 0.0015 |
| QX176 | N2 | N2 | 0.3629 | 0.3684 | 0.1828 | 0.0186 | 0.0077 |
| QX178 | N2 | N2 | 0.1931 | 0.3526 | 0.2917 | 0.0052 | 0.0030 |
| QX181 | N2 | N2 | 0.4082 | 0.4206 | 0.2970 | 0.0047 | 0.0047 |
| QX185 | N2 | N2 | 0.2426 | 0.3622 | 0.2302 | 0.0016 | 0.0016 |
| QX187 | N2 | N2 | 0.3141 | 0.4117 | 0.2232 | 0.0090 | 0.0033 |
| QX192 | N2 | N2 | 0.3595 | 0.3787 | 0.3005 | 0.0019 | 0.0019 |
| QX193 | N2 | N2 | 0.3361 | 0.4048 | 0.4271 | 0.0000 | 0.0000 |
| QX209 | N2 | N2 | 0.6398 | 0.5076 | 0.4523 | 0.0000 | 0.0000 |
| QX210 | N2 | N2 | 0.4550 | 0.3615 | 0.2636 | 0.0070 | 0.0016 |
| QX212 | N2 | N2 | 0.1931 | 0.3430 | 0.3093 | 0.0038 | 0.0038 |
| QX221 | N2 | N2 | 0.2213 | 0.3794 | 0.2707 | 0.0060 | 0.0060 |
| QX32  | N2 | N2 | 0.5179 | 0.5289 | 0.3374 | 0.0314 | 0.0210 |
| QX38  | N2 | N2 | 0.4263 | 0.3643 | 0.4797 | 0.0160 | 0.0070 |
| QX43  | N2 | N2 | 0.4175 | 0.4202 | 0.4366 | 0.0028 | 0.0028 |
| QX47  | N2 | N2 | 0.6021 | 0.4564 | 0.4482 | 0.0000 | 0.0000 |
| QX49  | N2 | N2 | 0.3608 | 0.3375 | 0.3339 | 0.0405 | 0.0124 |
| QX52  | N2 | N2 | 0.4450 | 0.4807 | 0.3873 | 0.0056 | 0.0056 |
| QX55  | N2 | N2 | 0.2515 | 0.3725 | 0.2285 | 0.0038 | 0.0038 |
| QX56  | N2 | N2 | 0.4048 | 0.3608 | 0.2953 | 0.0293 | 0.0118 |
| QX62  | N2 | N2 | 0.4880 | 0.3945 | 0.4938 | 0.0023 | 0.0023 |
| QX68  | N2 | N2 | 0.3203 | 0.1883 | 0.0949 | 0.0158 | 0.0069 |
| QX70  | N2 | N2 | 0.3945 | 0.5759 | 0.6063 | 0.0096 | 0.0048 |
| QX71  | N2 | N2 | 0.2674 | 0.2990 | 0.1863 | 0.0048 | 0.0048 |
| QX73  | N2 | N2 | 0.2889 | 0.3177 | 0.1424 | 0.0083 | 0.0018 |
| QX74  | N2 | N2 | 0.4711 | 0.4649 | 0.2408 | 0.0278 | 0.0158 |
| QX77  | N2 | N2 | 0.2536 | 0.3100 | 0.2443 | 0.0319 | 0.0250 |
| QX82  | N2 | N2 | 0.4331 | 0.3119 | 0.2362 | 0.0215 | 0.0052 |

**Supplementary Table S2:** Potential major effect SNPs linked with MAC, HAC, or leaving rates.

(attached as separated Excel files)

**Supplementary Table S3:** Genes linked with MAC. (attached as separated Excel files)

**Supplementary Table S4:** Genes linked with leaving events. (attached as separated Excel files)

**Supplementary Table S5:** The number of eQTLs for each of the 10 tested candidate genes doubly correlated with both MAC and leaving rates. The table also shows identities between N2 and HW in these genes and probes used for these genes.

| Gene     | Probe        | Position                | eQTLs | Identities (gene) | Identities (probe) |
|----------|--------------|-------------------------|-------|-------------------|--------------------|
| fbxa-103 | A_12_P119163 | chrI:14295999-14295940  | 31    | 0.99              | 1                  |
| ZC239.14 | A_12_P112216 | chrII:3221471-3221412   | 115   | 0.75              | 0.97               |
| AC8.7    | A_12_P109825 | chrX:231170-231279      | 152   | 1                 | 1                  |
| lnp-1    | A_12_P118204 | chrX:4590079-4590138    | 0     | 1                 | 1                  |
| F53C3.13 | A_12_P110917 | chrII:3921681-3921622   | 132   | 0.99              | 1                  |
| C25H3.1  | A_12_P101781 | chrII:5696760-5696701   | 51    | 1                 | 1                  |
| nspd-7   | A_12_P113469 | chrIV:10268975-10269187 | 0     | 0.99              | 1                  |
| R03H10.6 | A_12_P116652 | chrII:4171878-4171819   | 144   | 0.99              | 1                  |
| pho-1    | A_12_P112324 | chrII:5233429-5233293   | 6     | 0.99              | 1                  |
| F42G2.2  | A_12_P119326 | chrII:2425192-2425251   | 70    | 0.99              | 1                  |

**Supplementary Table S6: mRNA levels of the 10 tested genes in RIALs.**

|                 |       | 48 HW RIALs |       |           |             |        |                |                |       |      |
|-----------------|-------|-------------|-------|-----------|-------------|--------|----------------|----------------|-------|------|
|                 |       | Mean        | SE    | 95% CI of |             | Median | 25% Percentile | 75% Percentile | Min   | Max  |
| <b>fbxa-103</b> | NA    | 1.39        | 0.18  | 0.15      | -0.81, 1.53 | 0      | -0.25          | 0.72           | -0.99 | 1.97 |
| <b>F42G2.2</b>  | -1.06 | 0.98        | 0.06  | 0.08      | -0.71, 0.95 | -0.01  | -0.29          | 0.45           | -1.13 | 1.51 |
| <b>R03H10.6</b> | -2.26 | 2.37        | 0.27  | 0.43      | -3.26, 2.74 | 1.75   | -2.89          | 2.33           | -3.59 | 3.07 |
| <b>ZC239.14</b> | NA    | 0.83        | 0.21  | 0.18      | -1.24, 1.60 | 0.71   | -1             | 1.17           | -1.97 | 1.95 |
| <b>pho-1</b>    | -0.61 | 0.75        | 0.04  | 0.05      | -0.33, 0.42 | 0.02   | -0.2           | 0.34           | -0.64 | 1.03 |
| <b>AC8.7</b>    | -0.9  | 1.15        | -0.01 | 0.12      | -0.90, 1.06 | -0.12  | -0.7           | 0.55           | -0.99 | 1.53 |
| <b>Inp-1</b>    | -0.41 | 1.09        | 0.08  | 0.04      | -0.22, 0.36 | 0.05   | -0.1           | 0.23           | -0.41 | 1.09 |
| <b>nspd-7</b>   | 2.08  | -4.03       | 0.16  | 0.34      | -2.75, 2.80 | 1.22   | -2.39          | 2.32           | -4.03 | 3.41 |
| <b>C25H3.1</b>  | 0.44  | -1.43       | 0.03  | 0.10      | -0.92, 0.87 | 0.19   | -0.51          | 0.53           | -1.43 | 1.06 |
| <b>F53C3.13</b> | 1.38  | -0.64       | -0.11 | 0.18      | -1.70, 1.28 | 0.21   | -1.29          | 1.06           | -2.59 | 1.8  |

**Supplementary Table S7. Allele specific effects of the 9 genes identified by the single correlation method.** SNPs nearest to these genes are listed. Each SNP was used to separate the 48 RIALs into two groups of either carrying the HW or N2 allele of each gene. The difference in the average leaving rates between the two groups was examined by Student's t test (two tailed) and the *P* values of the test are shown.

| Gene Name | Direction <sup>1</sup> | SNP       | CHR <sup>2</sup> | Distance <sup>3</sup> | <i>P</i> value (T.TEST) <sup>4</sup> |
|-----------|------------------------|-----------|------------------|-----------------------|--------------------------------------|
| amx-2     | -                      | CE1-209   | I                | 20861                 | 0.901094                             |
| K01A11.3  | -                      | UCE2-1313 | II               | 49455                 | 0.483471                             |
| K08C7.1   | +                      | UCE4-1116 | IV               | -3924                 | 0.910193                             |
| dos-2     | +                      | UCE2-1515 | II               | -8252                 | 0.073865                             |
| Y25C1A.13 | +                      | UCE2-1230 | II               | 16093                 | 0.042772                             |
| F44G4.7   | +                      | CE2-170   | II               | -2927                 | 0.131773                             |
| T16H12.2  | -                      | CE3-185   | III              | 7841                  | 0.179695                             |
| F37H8.3   | +                      | UCE2-1985 | II               | 77811                 | 0.963926                             |
| Y44A6C.1  | +                      | UCE5-3397 | V                | -62506                | 0.177455                             |

<sup>1</sup>Direction: Direction of correlation with both MAC and leaving rates. +, positive correlation; -, inverse correlation.

<sup>2</sup>Chr: Chromosome where the gene and SNP are located.

<sup>3</sup>Distance without a '-' sign means that the SNP is located in front of the 5' end of the gene and the distance is between the SNP and first codon of the gene. Distance with a '-' sign means that the SNP is located at the 3' end of the gene and the distance is between the SNP and the stop codon of the gene.

<sup>4</sup>The difference in the average leaving rate between N2 and HW allele groups was examined by Student's t test (two tailed) and the *P* values of the test are shown.

**Supplementary Table S8: Primers for RNAi fragments.**

| Chr | Gene Name        | Fwd Primer Seq            | Rev Primer Seq          |
|-----|------------------|---------------------------|-------------------------|
| IV  | <i>K08C7.1</i>   | CGCTTTGCCTGTGTCTCATA      | TGCTGCTTTCAATCGTTTTG    |
| II  | <i>dos-2</i>     | ACTGTA CT CGGAGGGGACCT    | GATCCGGGTTTTGTCTGAAA    |
| IV  | <i>M7.8</i>      | AGATTT CAT CGCAATCACACTTT | TTCAGTCGTCCAAAATCTTTCAT |
| III | <i>K01A11.3</i>  | TCGTGTGGAGCAAACTGAG       | GAAAAATGGGGACATTGTGG    |
| IV  | <i>dis-3</i>     | TGATGACGAGAACGATGAGC      | AACGTCAATGCTCCATTTC     |
| I   | <i>fbxa-103</i>  | AAGGCGGGATCAAAA CTCT      | CACCAAACA ACTTGACACCG   |
| X   | <i>Inp-1</i>     | GAAAACGTATGTGGCGTGTG      | ACTCCGGGACCTTCTCATT     |
| II  | <i>ZC239.14</i>  | GGAATACTTCTCAATGAACGCAC   | AACAACAATTTGGTAAGGCTGAA |
| II  | <i>F42G2.2</i>   | CTCAACTCCGTAGGCACACA      | GTAACGTCCGGTTCCAAAGA    |
| IV  | <i>nspd-7</i>    | AGACGAATTGCAACATAGGAAAA   | ACAGAAATCGCCAGTTTATCAGA |
| V   | <i>R04B5.11</i>  | GAATTT CAGAGTTGAGTCGGATG  | AATAGGCAAGTATGGAGTGAGCA |
| IV  | <i>F40F11.3</i>  | TCCCTTTTTACTCTGATCCAA     | CCATACATCGATGAGGACAAAAT |
| IV  | <i>F55G1.15</i>  | CAGCTCTCTCTGACCT          | CCAGCATTATCATTCCCCAC    |
| X   | <i>K04E7.3</i>   | CGTTAACTCCGACCACGAT       | CTCCATGGGTAACCAGCCTA    |
| II  | <i>R03H10.6</i>  | GCCTCGAGCATTGTATCCAT      | AGCGACACTATCCAGCTA      |
| II  | <i>pho-1</i>     | ACTTCCGTCTTGCTCGTGAT      | GTCCA ACTTGCTCGGACAAT   |
| II  | <i>C25H3.1</i>   | CCCTTTTTGGATAGAATTATGGC   | ACACAATATCACAAGTGAACCCC |
| IV  | <i>AC8.7</i>     | TCCGTATTTTTACAGCGAATTGT   | GAAAAAGAAACGGAAGAAAGGAA |
| II  | <i>Y25C1A.13</i> | TTGCCTCACTCCAGAATACATT    | ATTCTCGGTCATTTTTCGAATTT |
| II  | <i>F44G4.7</i>   | CCTTTTCCCACTCGTTTTCA      | TTGGTTTTAGGTCCTGCGTC    |
| III | <i>T16H12.2</i>  | ATTTCCCTCTACCTCGTTGATTC   | GAGAAGAAGGAAACTTTGGGT   |
| V   | <i>Y44A6C.1</i>  | AAATCAAATCCCGGAAAACC      | TGACTTCAGCACCATCAAGC    |
| II  | <i>F37H8.3</i>   | GCAGACACACTTAGCTGCCTATT   | CTTTTCTGCAGCTTCAATGTTTT |
| I   | <i>amx-2</i>     | TAAAAATGGTTGAGGCGCTATTA   | ATTGCTTCATTTTCAGGATCTCA |
| II  | <i>F53C3.13</i>  | GGTTTTTCTTCAAATTTGCTTT    | TCGTGGTTTCTACTGTGATGATG |
| III | <i>uaf-1</i>     | TGCAACTCGGCGACAAGCAG      | AGAATTGACGATTGTGGTACTTG |
